# Supplementary material for: miRNA–protein–metabolite interaction network reveals the regulatory network and players of pregnancy regulation in dairy cows
Source: Front Cell Dev Biol. 2024 Aug 2;12:1377172. doi: 10.3389/fcell.2024.1377172 (PMC11329941; doi:10.3389/fcell.2024.1377172)
Supplement: Supplementary file 1 [file Table2.xlsx]

## Sheet: analysis_GO_Slim_FDR_less
Supplementary Table S2: GO-Slim Biological Process of the target genes of the miRNA fingerprints in dairy cows.
Analysis Type:	PANTHER Overrepresentation Test (Released 20240226)
Annotation Version and Release Date:	PANTHER version 18.0 Released 2023-08-01
Analyzed List:	upload_1 (Bos taurus)
Reference List:	Bos taurus (all genes in database)
Test Type:	FISHER
Correction:	FDR
PANTHER GO-Slim Biological Process	Bos taurus - REFLIST (23838)	upload_1 (1095)	upload_1 (expected)	upload_1 (over/under)	upload_1 (fold Enrichment)	upload_1 (raw P-value)	upload_1 (FDR)
filopodium assembly (GO:0046847)	5	3	0.23	+	13.06	0.000901	0.0462
negative regulation of cAMP-mediated signaling (GO:0043951)	5	3	0.23	+	13.06	0.000901	0.0451
regulation of cAMP-mediated signaling (GO:0043949)	5	3	0.23	+	13.06	0.000901	0.0441
negative regulation of inflammatory response (GO:0050728)	17	5	0.78	+	6.4	0.000789	0.0435
histone deacetylation (GO:0016575)	22	6	1.01	+	5.94	0.000367	0.0288
positive regulation of neurogenesis (GO:0050769)	34	8	1.56	+	5.12	0.000121	0.0106
positive regulation of cell differentiation (GO:0045597)	69	16	3.17	+	5.05	6.78e-08	2.99e-05
positive regulation of protein kinase activity (GO:0045860)	33	7	1.52	+	4.62	0.000633	0.041
regulation of neurogenesis (GO:0050767)	69	14	3.17	+	4.42	2.49e-06	0.000323
positive regulation of nervous system development (GO:0051962)	49	9	2.25	+	4	0.000344	0.0281
regulation of nervous system development (GO:0051960)	88	16	4.04	+	3.96	2.26e-06	0.000332
regulation of cell development (GO:0060284)	96	17	4.41	+	3.86	1.61e-06	0.000253
positive regulation of cell development (GO:0010720)	51	9	2.34	+	3.84	0.00047	0.0345
positive regulation of developmental process (GO:0051094)	109	18	5.01	+	3.6	2.29e-06	0.000316
regulation of cell differentiation (GO:0045595)	143	23	6.57	+	3.5	1.55e-07	5.69e-05
regulation of multicellular organismal development (GO:2000026)	150	22	6.89	+	3.19	1.45e-06	0.000245
regulation of developmental process (GO:0050793)	280	31	12.86	+	2.41	7.66e-06	0.000888
negative regulation of response to stimulus (GO:0048585)	294	30	13.5	+	2.22	5.38e-05	0.00539
negative regulation of signal transduction (GO:0009968)	229	23	10.52	+	2.19	0.000623	0.0416
negative regulation of cell communication (GO:0010648)	236	23	10.84	+	2.12	0.000761	0.0453
negative regulation of signaling (GO:0023057)	238	23	10.93	+	2.1	0.000819	0.044
actin cytoskeleton organization (GO:0030036)	280	26	12.86	+	2.02	0.000746	0.0456
actin filament-based process (GO:0030029)	291	27	13.37	+	2.02	0.000566	0.0402
nitrogen compound transport (GO:0071705)	611	48	28.07	+	1.71	0.000371	0.0282
regulation of response to stimulus (GO:0048583)	886	66	40.7	+	1.62	0.000111	0.0102
organic substance transport (GO:0071702)	910	67	41.8	+	1.6	0.000137	0.0116
cell surface receptor signaling pathway (GO:0007166)	721	53	33.12	+	1.6	0.000772	0.0436
regulation of signaling (GO:0023051)	736	54	33.81	+	1.6	0.000856	0.0449
organic substance catabolic process (GO:1901575)	848	61	38.95	+	1.57	0.00057	0.0392
transport (GO:0006810)	1912	136	87.83	+	1.55	2.56e-07	8.05e-05
catabolic process (GO:0009056)	956	67	43.91	+	1.53	0.00065	0.0409
cell communication (GO:0007154)	2375	143	109.1	+	1.31	0.000766	0.0444
signaling (GO:0023052)	2338	140	107.4	+	1.3	0.00103	0.0493
regulation of biological process (GO:0050789)	6138	345	281.95	+	1.22	1.31e-05	0.00137
biological regulation (GO:0065007)	6470	363	297.2	+	1.22	7.01e-06	0.000857
regulation of cellular process (GO:0050794)	5627	313	258.48	+	1.21	9.57e-05	0.00917
system process (GO:0003008)	721	7	33.12	-	0.21	3.61e-08	1.99e-05
nervous system process (GO:0050877)	625	3	28.71	-	0.1	1.36e-09	2.99e-06
sensory perception (GO:0007600)	535	2	24.58	-	0.08	6.76e-09	4.97e-06
detection of stimulus (GO:0051606)	376	1	17.27	-	0.06	6.47e-07	0.000143
sensory perception of chemical stimulus (GO:0007606)	478	1	21.96	-	0.05	6.47e-09	7.12e-06
